# Supplementary material for: DiscoRhythm: an easy-to-use web application and R package for discovering rhythmicity
Source: PubMed Central journal article supplement — Bioinformatics. 2019 Nov 8;36(6):1952–4. doi: 10.1093/bioinformatics/btz834 (PMC7703757; doi:10.1093/bioinformatics/btz834), 2019-11-08
Supplement: btz834_supplementary_data.pdf [file btz834_supplementary_data.pdf]

| ARSER Execution Times (seconds) |    |            |       |        |         |                     |
|---------------------------------|----|------------|-------|--------|---------|---------------------|
|                                 |    | # Features |       |        |         | Average Fold Change |
|                                 |    | 100        | 1,000 | 10,000 | 100,000 |                     |
| # Samples                       | 10 | 3.1        | 14    | 144    | 3,240   | 11.7                |
|                                 |    | 1.6        | 4.7   | 26     | 258     |                     |
|                                 | 20 | 3.5        | 19    | 192    | 3,600   | 10.0                |
|                                 |    | 2.6        | 6.6   | 35     | 336     |                     |
|                                 | 40 | 8.4        | 57    | 570    | 7,200   | 14.5                |
|                                 |    | 3.3        | 9.0   | 49     | 480     |                     |
|                                 | 80 | 9.6        | 72    | 720    | 8,400   | 11.4                |
|                                 |    | 4.3        | 11    | 72     | 720     |                     |

|          |
|----------|
| Original |
| Modified |

| JTK Cycle Execution Times (seconds) |    |            |       |        |         |                     |
|-------------------------------------|----|------------|-------|--------|---------|---------------------|
|                                     |    | # Features |       |        |         | Average Fold Change |
|                                     |    | 100        | 1,000 | 10,000 | 100,000 |                     |
| # Samples                           | 10 | 1.4        | 2.8   | 15     | 144     | 3.6                 |
|                                     |    | 1.3        | 2.0   | 5.5    | 37      |                     |
|                                     | 20 | 2.2        | 5.5   | 33     | 312     | 4.0                 |
|                                     |    | 2.5        | 3.5   | 11     | 72      |                     |
|                                     | 40 | 5.4        | 14    | 90     | 900     | 4.5                 |
|                                     |    | 5.4        | 8.4   | 25     | 186     |                     |
|                                     | 80 | 48         | 84    | 426    | 3,960   | 4.5                 |
|                                     |    | 46         | 54    | 120    | 780     |                     |

| Lomb-Scargle Execution Times (seconds) |    |            |       |        |         |                     |
|----------------------------------------|----|------------|-------|--------|---------|---------------------|
|                                        |    | # Features |       |        |         | Average Fold Change |
|                                        |    | 100        | 1,000 | 10,000 | 100,000 |                     |
| # Samples                              | 10 | 2.5        | 14    | 144    | 2,760   | 10.3                |
|                                        |    | 1.7        | 4.7   | 26     | 252     |                     |
|                                        | 20 | 3.3        | 17    | 162    | 2,940   | 9.7                 |
|                                        |    | 2.8        | 6.0   | 32     | 282     |                     |
|                                        | 40 | 4.1        | 21    | 198    | 3,240   | 8.7                 |
|                                        |    | 3.3        | 7.8   | 38     | 348     |                     |
|                                        | 80 | 5.9        | 30    | 294    | 4,080   | 7.5                 |
|                                        |    | 4.3        | 10    | 55     | 516     |                     |

| Cosinor Execution Times (seconds) |    |            |        |        |         |                     |
|-----------------------------------|----|------------|--------|--------|---------|---------------------|
|                                   |    | # Features |        |        |         | Average Fold Change |
|                                   |    | 100        | 1,000  | 10,000 | 100,000 |                     |
| # Samples                         | 10 | 0.0054     | 0.031  | 0.29   | 3.30    | 29.1                |
|                                   |    | 0.0013     | 0.0025 | 0.013  | 0.11    |                     |
|                                   | 20 | 0.0056     | 0.032  | 0.32   | 2.88    | 14.8                |
|                                   |    | 0.0014     | 0.0029 | 0.017  | 0.20    |                     |
|                                   | 40 | 0.0060     | 0.037  | 0.31   | 3.24    | 11.3                |
|                                   |    | 0.0017     | 0.0042 | 0.025  | 0.29    |                     |
|                                   | 80 | 0.0066     | 0.041  | 0.38   | 5.16    | 10.0                |
|                                   |    | 0.0022     | 0.0066 | 0.046  | 0.50    |                     |

**Supplementary Table S1. Performance improvements to rhythm detection algorithms.** ARSER, Lomb-Scargle, and JTK Cycle implementations are from R package MetaCycle version 1.1 and version 1.2 (contributed by the DiscoRhythm authors) for “original” and “modified”, respectively. Cosinor implementations are from R package HarmonicRegression version 1.0 and DiscoRhythm version 1.1.1 for “original” and “modified” implementations, respectively. To ensure all algorithms could be used, a period was chosen for each sample size such that samples span integers of the period (e.g., a sample size of N was assigned times from 1 to N and tested on a period of N). Performance tests were performed on a 2.66Ghz Intel Xeon (X5650) 6-core using R 3.6 and utilizing all available cores.

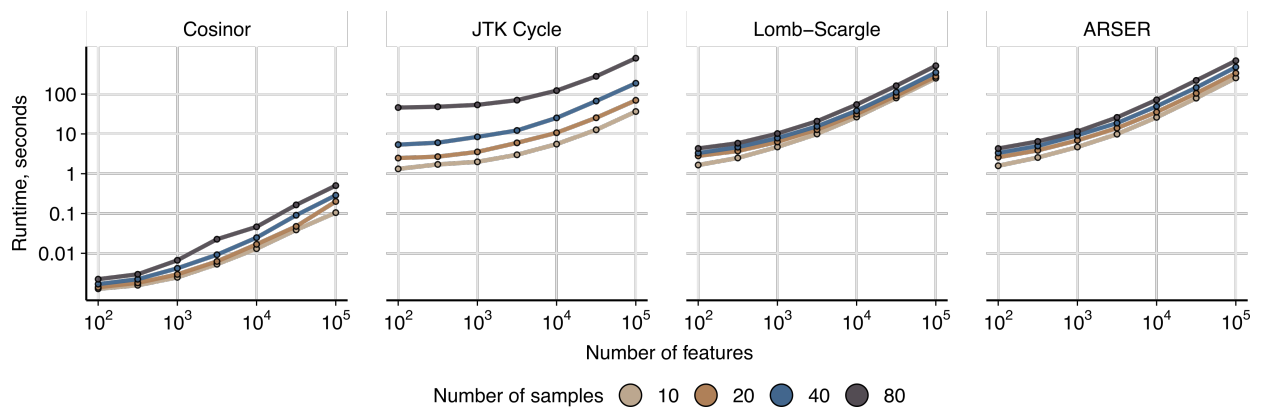

**Supplementary Fig. S1. Execution times of oscillation detection algorithms with varying number of samples and features.** Log-scale execution runtimes of each algorithm on datasets with increasing numbers of features (rows) and samples (columns) for the improved implementations of the algorithms.
